# Supplementary material
Source: ML conference proceedings conference paper supplement (https://proceedings.neurips.cc/paper_files/paper/2019/hash/5b4a2146246bc3a3a941f32225bbb792-Abstract.html)

Density

VI=LCVI

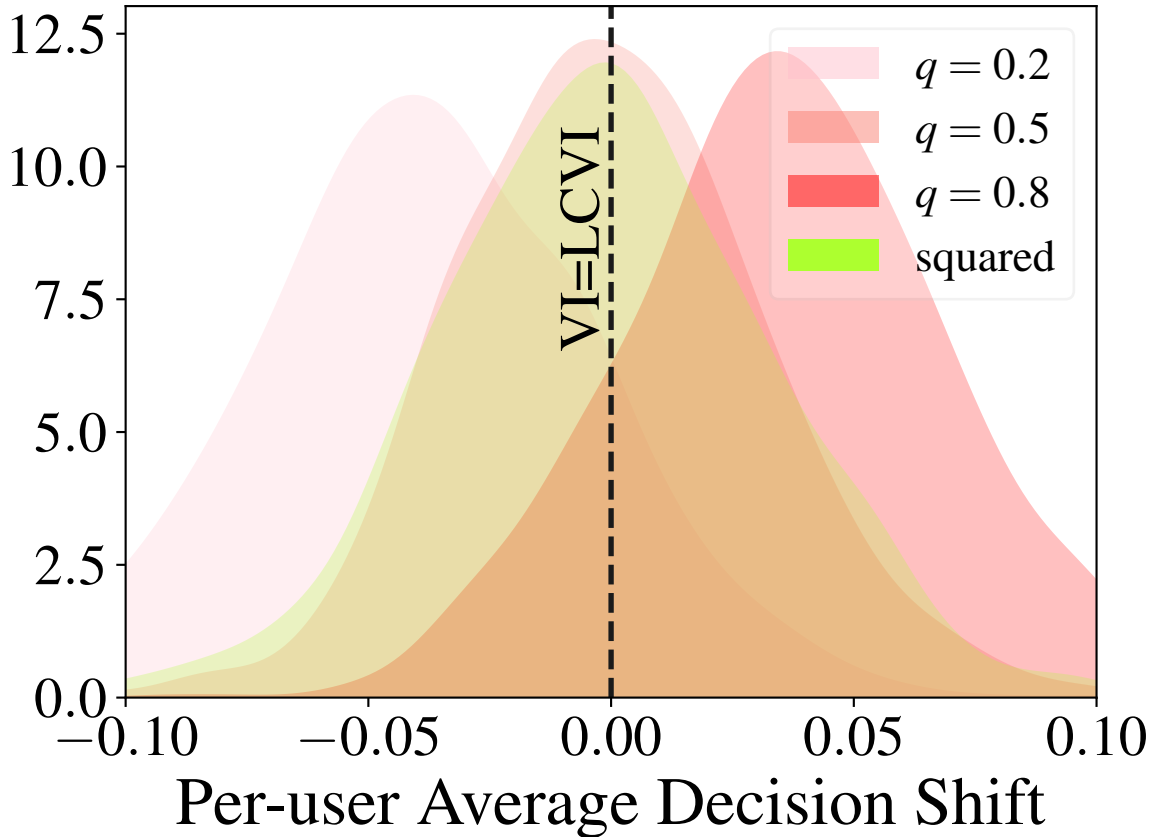

Supplement: Supplementary file [file 5b4a2146246bc3a3a941f32225bbb792-Supplemental.zip]
